# Supplementary material
Source: Springer Nature journal article supplement (https://www.springermedizin.de/resource/supplementary/13019_2010_368_MOESM4_ESM.pdf/9638634)

Foam

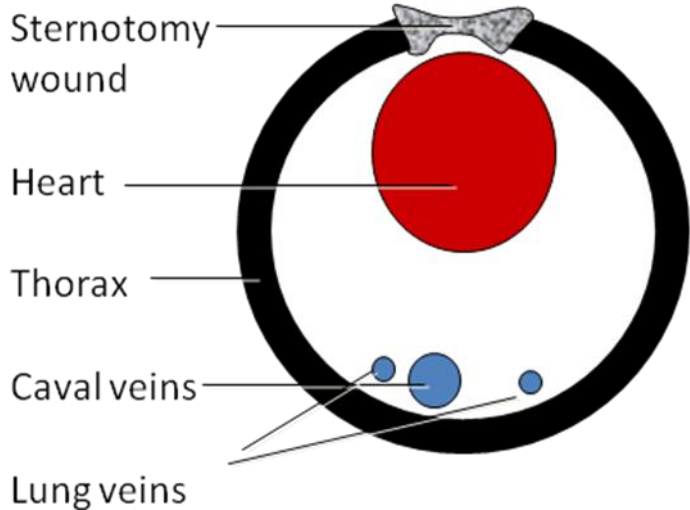

Gauze

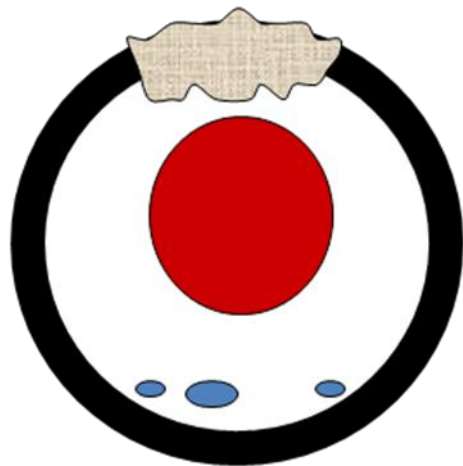

Supplement: MOESM4 [file 9638634]
